# Supplementary material for: Grasslands And Forests In Nebraska Are Vulnerable To Tree Invasion From Roadsides
Source: Research Square preprint supplement (doi:10.21203/rs.3.rs-1086862/v1), 2021-12-28
Supplement: Supplementary file 1 [file 9f52f7da5e0c5d2b0041beaa.docx]

**Supplementary Table S1.** Landcover type and ROW/roadside area within the study region.

| Study area | 6,140 ha |
| --- | --- |
| Rangeland area | 3,347 ha |
| Forest area | 417 ha |
| Total road length | 111,965 m/112 km |
| Average ROW width | 5.8 m |
| ROW area (per road-side) | 653,875.7 m2/65.4 ha |
| Total ROW area | 130.8 ha |


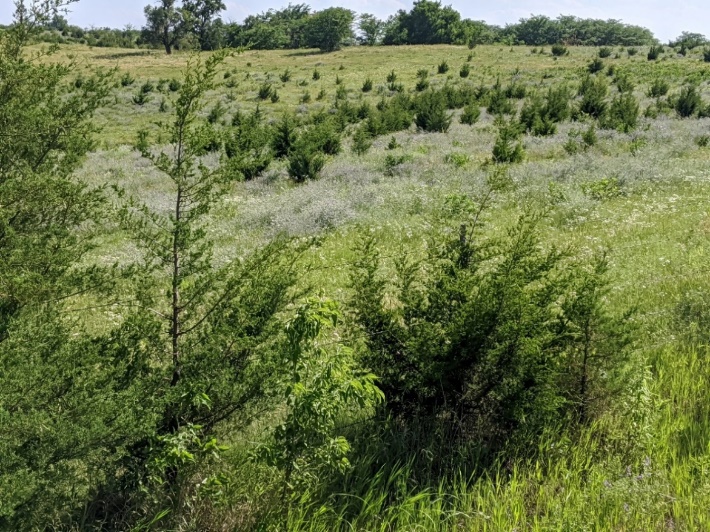

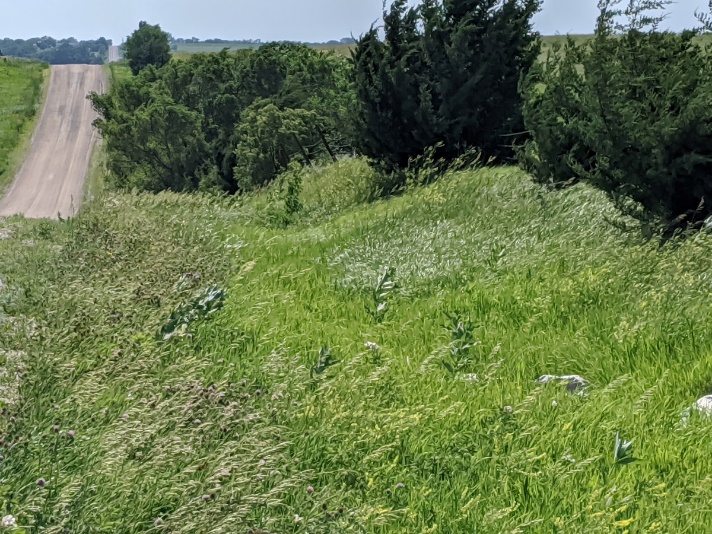


**Supplementary Figure F1.** Photographs depicting current tree invasion along roadsides in the Denton Hills study area.


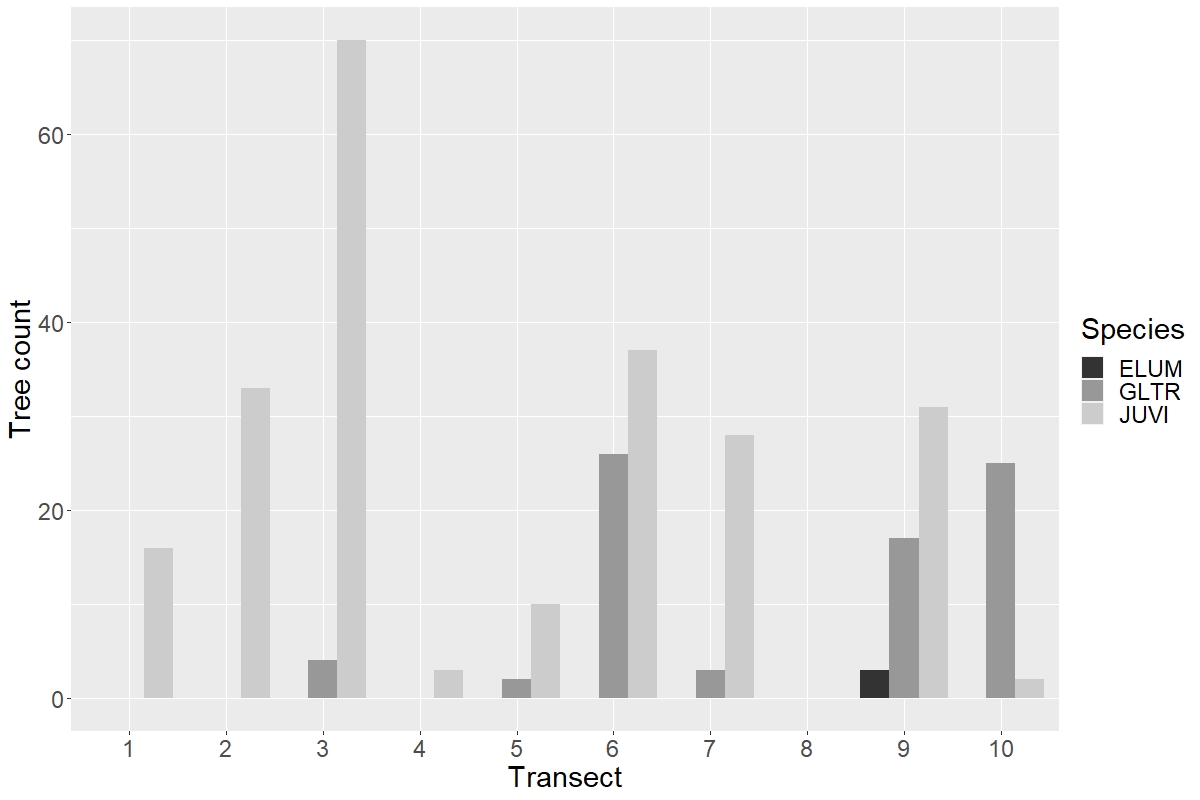


**Supplementary Figure F2.** Tree species counts across transects (n = 10). JUVI = *Juniperus virginiana*, GLTR = *Gleditsia tricanthos*. ELUM = *Elaeagnus umbellata*.
